# 1 Low-intensity environmental education 2 can enhance perceptions of culturally 3 taboo wildlife

4  
5  
6 Samuel T. Williams<sup>1,2,3</sup>, Kathryn S. Williams<sup>2</sup>, Natasha Constant<sup>4,5</sup>, Lourens H. Swanepoel<sup>1</sup>, Peter J.  
7 Taylor<sup>4,6</sup>, Steven R. Belmain<sup>7</sup>, Steven W. Evans<sup>8</sup>

8  
9 <sup>1</sup>Department of Zoology, School of Mathematical & Natural Sciences, University of Venda, Thohoyandou,  
10 South Africa

11 <sup>2</sup>Department of Anthropology, Durham University, Durham, United Kingdom

12 <sup>3</sup>Institute for Globally Distributed Open Research and Education (IGDORE)

13 <sup>4</sup>South African Research Chair on Biodiversity Value & Change, University of Venda, Thohoyandou, South  
14 Africa

15 <sup>5</sup>Sustainable Places Research Institute, Cardiff University, United Kingdom

16 <sup>6</sup>School of Life Sciences, University of KwaZulu-Natal, South Africa

17 <sup>7</sup>Natural Resources Institute, University of Greenwich, Chatham Maritime, United Kingdom

18 <sup>8</sup>Southern Cape Conservation Organisation, Oudtshoorn, South Africa

19

20 Keywords: owl; rodent, attitudes; witchcraft; pest management; behavioural change; environmental  
21 education; ecologically-based rodent management; taboo

22

23 Corresponding authors: Samuel Williams ([samual.t.williams@gmail.com](mailto:samual.t.williams@gmail.com)) & Lourens Swanepoel  
24 ([lourens.swanepoel.univen@gmail.com](mailto:lourens.swanepoel.univen@gmail.com))

25

## 26 1. Abstract

27 Traditional cultural beliefs influence perceptions of animals, and in some cases can result in persecution of  
28 wildlife. Stigmas against species associated with witchcraft, for example, can act as a barrier to the uptake  
29 of more cost effective, sustainable, and environmentally sound practices such as reducing crop damage by  
30 controlling rodent agricultural pests by relying on indigenous predators rather than pesticides. One way of  
31 enhancing perceptions of wildlife to increase participation in such ecologically-based rodent management  
32 (EBRM) schemes, is the development of environmental education initiatives. Low intensity programmes  
33 are cost-effective and can produce positive attitudinal shifts, but their impact has not been assessed for  
34 species strongly associated with witchcraft. We set out to test whether a single presentation on the natural  
35 history of owls (order Strigiformes) could improve perceptions of these species, and increase willingness  
36 to participate in an EBRM scheme that involved the installation of owl boxes to increase owl populations  
37 and reduce rodent populations and crop damage in agricultural fields. We used a questionnaire survey to  
38 assess perceptions of owls at four schools in two villages in South Africa. Our initial survey sampled  
39 perceptions of respondents before listening to the presentation. A follow-up survey conducted three months  
40 later sampled the perceptions of respondents that had listened to the presentation as well as perceptions of  
41 a control group that did not listen to the presentation. We found that associations between owls and

42 witchcraft was a common theme driving negative perceptions of owls. Respondents that watched the  
43 presentation had more positive perceptions of owls than respondents that had not watched the presentation,  
44 and they were more likely to be willing to put up owl boxes near their home. Despite this shift, negative  
45 perceptions of owls still dominated responses due to cultural associations with the occult. These findings  
46 indicate that even low-intensity programmes can be effective at enhancing perceptions of wildlife  
47 associated with witchcraft. We suggest that environmental education programmes featuring culturally taboo  
48 species should adopt a culturally sensitive and locally tailored approach, focus on the benefits these species  
49 provide, and may be more effective when delivered with greater intensity.

50

## 51 2. Introduction

52 Human interactions with the natural world are frequently rooted in rich cultural interpretations (Becken *et*  
53 *al.*, 2013; Garibaldi and Turner, 2004; Risiro *et al.*, 2013). Historically, cultural interpretations of nature  
54 were overlooked in conservation strategies by pursuing an exclusionary ‘fortress’ approach to  
55 environmental management and reducing cultural constructs to non-tangible ideologies (Binnema and  
56 Niemi, 2006; Drew and Henne, 2006; Tyrrell, 2010). However, cultural interpretations of animals can have  
57 significant implications for wildlife conservation, especially when they manifest in physical outcomes that  
58 either protect or endanger species (Dickman, 2010; Madden and McQuinn, 2014). Even cultural  
59 interpretations of imaginary creatures can impact wildlife conservation (Holmes *et al.*, 2018). Recent  
60 research highlights the futility of pursuing a purely biological based conservation agenda without  
61 addressing relevant cultural considerations, especially in situations of human-wildlife conflict (Dickman,  
62 2010; Madden and McQuinn, 2014; Peterson *et al.*, 2010). Consequently, conservationists are beginning to  
63 recognise the need to integrate social science perspectives into their work and adopt a more interdisciplinary  
64 approach (Balmford and Cowling, 2006; Mascia *et al.*, 2003; White and Ward, 2011), although uptake can  
65 be slow (Montgomery *et al.*, 2018).

66  
67 Cultural beliefs such as those linked to witchcraft and the occult are integral to many cultures, especially in  
68 Africa, and although mythologies vary substantially, associations between animals and the supernatural are  
69 common (Dickman *et al.*, 2013; Geschiere, 1997; Kesby, 2003). In southern African societies uneven access  
70 to material possessions, wealth, education, and basic healthcare persist, partially as legacies of colonialism  
71 and apartheid (Gradin, 2014; Özler, 2007; Rust *et al.*, 2016). Unequal distribution of resources creates fears  
72 and jealousies which may be expressed through accusations of witchcraft or soul eating, negatively eroding  
73 social structures within communities (Geschiere, 1997; Schmoll, 1993; Smith & Andindilile, 2017).  
74 Witches are defined as human beings consumed by jealousy, greed, malice, and antisocial tendencies who  
75 use supernatural powers to harm others (Ashforth, 2005; Hickel, 2014; Niehaus *et al.*, 2001). Witches are  
76 excluded from personhood due to their immoral and antisocial characteristics, and their ability to transform  
77 into animal familiars (Niehaus *et al.*, 2001).

78  
79 Witches use animals in multiple ways: animals may signify a witch's presence; animals can act as a witch's  
80 familiar; animal parts are used in *muti* (traditional medicine); and after death, animals may become a  
81 vessel for the witch's spirit to spread further malevolence (Morris, 2000; Niehaus *et al.*, 2001). Predators,  
82 nocturnal species, and animals considered dangerous such as owls, hyaenas (family Hyaenidae), cats  
83 (family Felidae), or snakes (suborder Serpentes) are most commonly associated with the occult (Cumes,  
84 2004; Niehaus *et al.*, 2001). Under some circumstances, fear of these animals is more strongly associated  
85 with the human construct of witchcraft than the animals' biological characteristics (Williams, 2017).  
86 Animals associated with witches are often killed as a precautionary measure or for use in traditional  
87 medicine (Mikkola and Mikkola, 1997; Williams *et al.*, 2013).

88  
89 Ironically, some of the species most heavily persecuted due to associations with witchcraft provide valuable  
90 services to rural communities such as controlling agricultural pests (Muñoz-Pedreros *et al.*, 2018; Williams

91 *et al.*, 2018b). Smallholder agriculture supports the majority of impoverished people in rural areas  
92 (Tschardtke *et al.*, 2012; World Bank, 2007), but one of the key constraints on food production to  
93 smallholder farmers, is crop damage caused by pests such as rodents (Swanepoel *et al.*, 2017). Existing pest  
94 control in these areas tends to rely heavily on rodenticides, but such practices cause environmental  
95 contamination, poisoning of non-target species, and result in the development of physiological and  
96 behavioural resistance to the products used (Buckle and Smith, 2015). To overcome these problems, an  
97 alternative approach termed ecologically-based rodent management (EBRM) was developed (Singleton *et*  
98 *al.*, 1999), which emphasises more sustainable pest management solutions such as biological control by  
99 native species such as mammalian carnivores (order Carnivora) (Williams *et al.*, 2018b) or avian predators  
100 such as owls (order Strigiformes) (Labuschagne *et al.*, 2016). The density of rodents near crop fields as  
101 well as crop damage can be reduced, for example, by erecting artificial nest boxes for owls (Labuschagne  
102 *et al.*, 2016; Paz *et al.*, 2013). The adoption of EBRM strategies for rodent pest management can therefore  
103 effectively reduce rodent damage whilst decreasing reliance on rodenticides (Jacob *et al.*, 2010; Taylor *et*  
104 *al.*, 2012).

105  
106 Superstitious cultural beliefs about species can act as a barrier to the acceptance of using the pest control  
107 ecosystem services offered by these species (Williams *et al.*, 2018b). One tool that can be used to enhance  
108 perceptions of wildlife is environmental education, which can increase knowledge and provoke positive  
109 behavioural changes in recipients and their families (Boudet *et al.*, 2016; Lawson *et al.*, 2019;  
110 Rakotomamonjy *et al.*, 2015). Education schemes have been successfully applied to increase rates of EBRM  
111 adoption; boosting crop yields as a result (Flor and Singleton, 2011). However, environmental knowledge  
112 does not always equate to positive conservation actions (Knapp and Poff, 2001). Farmers in Kenya who  
113 demonstrated greater knowledge about owl diets were more likely to use pesticides and kill owl prey than  
114 farmers with lower levels of understanding (Ogada and Kibuthu, 2008). This trend was attributed to a lack  
115 of knowledge about the interrelationships in ecological processes (Ogada and Kibuthu, 2008). Improving

116 EBRM uptake is reliant on delivering education that stresses the benefits native species can provide farmers  
117 and emphasises the ecological interconnectedness between rodents, pesticides, and predators (Makundi and  
118 Massawe, 2011; Ogada and Kibuthu, 2008).

119

120 Long-term education initiatives are expensive, with lack of funding being the major constraint on many  
121 programmes (McDuff and Jacobson, 2001), and there are increasing calls to ensure that conservation  
122 strategies such as environmental education programmes are cost effective (Cook *et al.*, 2017; Naidoo *et al.*,  
123 2006). This can be achieved by tailoring environmental education programmes to the audience, available  
124 resources, and time constraints (Offord-Woolley *et al.*, 2016). Although carefully crafted short-term  
125 environmental education programmes can successfully increase knowledge and foster positive  
126 environmental perceptions (Farmer *et al.*, 2007; Leeds *et al.*, 2017; Rakotomamonjy *et al.*, 2015), it is yet  
127 to be determined if low intensity environmental education can sensitively and cost effectively enhance  
128 perspectives of culturally taboo species. Utilising a case study approach, we examined young people's  
129 perceptions of owls in two rural South African communities before and after conducting a low intensity  
130 environmental education programme. We assessed whether listening to a single presentation on the natural  
131 history of owls, their biological benefits, and the roles of owls and humans within the ecosystem could  
132 improve perceptions of these species, and increase willingness to take part in a future EBRM trial to help  
133 reduce agricultural damage from rodent pests by installing owl nest boxes. We hypothesise that attitudes  
134 towards owls will show a moderate improvement in response to the environmental education scheme, but  
135 improvements may be limited by the low intensity of the programme and how deeply entrenched such  
136 cultural beliefs tend to be.

137

## 138 3. Methods

### 139 3.1. Study site

140 We assessed the influence of a low-intensity environmental education programme on perceptions of owls  
141 in Ka-Ndengeza (S23.31003 E30.40981) and Vyeboom (S23.15174 E30.39278), two rural villages in  
142 Limpopo Province, South Africa (Fig. 1). Vyeboom, located in Makhado municipality, has a population of  
143 approximately 5,000, and the most commonly spoken language is Tshivenda (Statistics South Africa,  
144 2019b). In Ka-Ndengeza, Mopani municipality, the population of around 3,500 predominantly speak  
145 Xitsonga (Statistics South Africa, 2019a). A small percentage of residents of both villages practice small-  
146 scale agriculture, with crops including maize *Zea mays*, peanuts *Arachis hypogaea*, beans *Phaseolus*  
147 *vulgaris*, avocados *Persea americana*, pumpkins *Cucurbita* spp, mangoes *Mangifera* spp, bananas *Musa*  
148 spp, litchis *Litchi chinensis*, and oranges *Citrus* spp. Livestock such as cattle *Bos taurus*, donkeys *Equus*  
149 *africanus asinus*, sheep *Ovis aries*, goats *Capra aegagrus hircus*, and poultry such as chickens *Gallus gallus*  
150 *domesticus* were also kept (Williams *et al.*, 2018b).

151

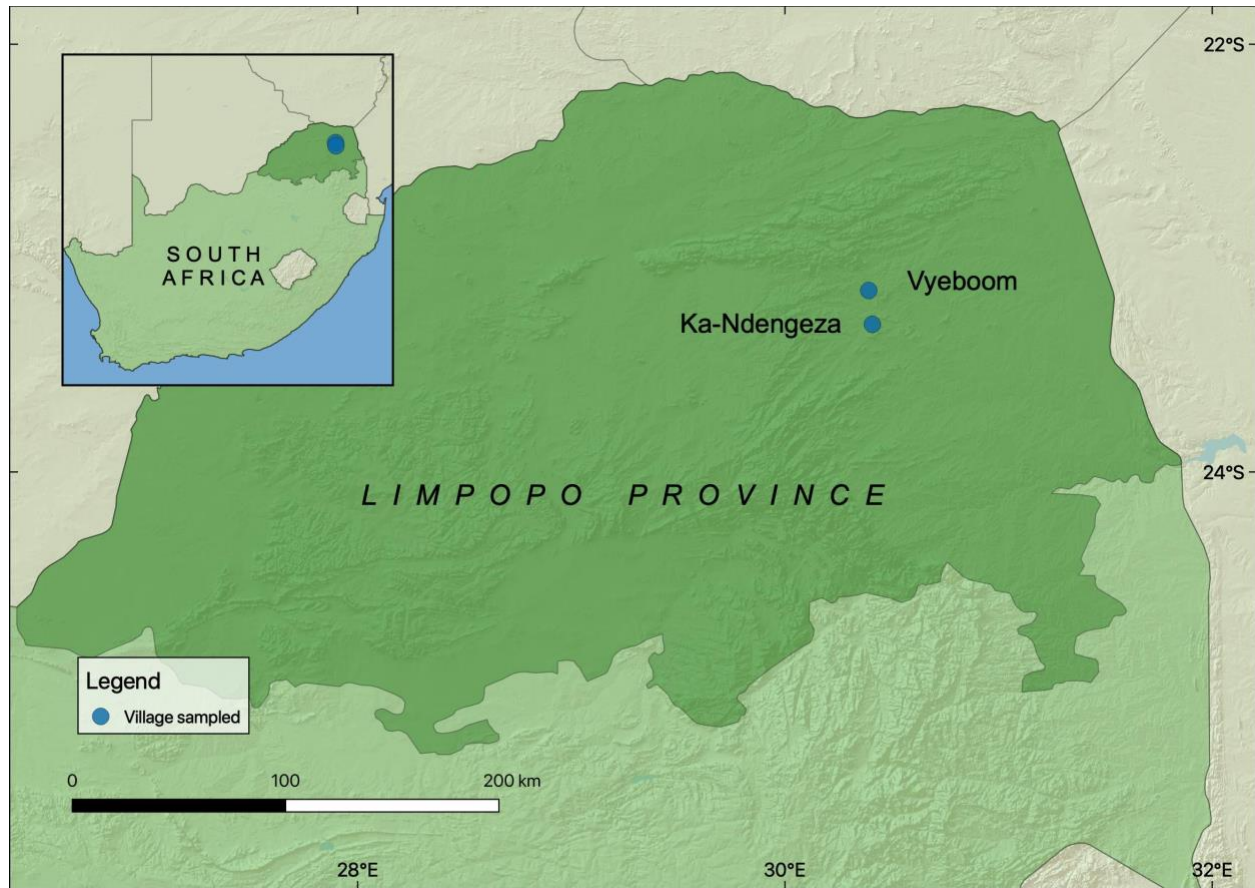

152

153 Fig. 1. Map of the study sites showing the location of the villages included in the study.

154

155 Rainfall at both sites is approximately 700–800 mm per year. There is a hot wet season from October to  
156 March and a cool dry season from May to August (Hijmans *et al.*, 2005). The main vegetation types are  
157 Granite Lowveld and Gravelotte rocky bushveld (Mucina and Rutherford, 2006). Natural vegetation in  
158 uplands is dominated by *Combretum zeyheri* and *C. apiculatum* woodlands, while low lying areas are  
159 characterised by dense thicket to open savanna dominated by *Senegalia (Acacia) nigrescens*, *Dichrostachys*  
160 *cinerea*, and *Grewia bicolor* (Mucina and Rutherford, 2006; Williams *et al.*, 2018a). Of the 12 species of  
161 owls that occur in South Africa, four are found at the study sites: the western barn owl *Tyto alba*, spotted  
162 eagle-owl *Bubo africanus*, Verreaux's eagle-owl *Bubo lacteus*, and pearl-spotted owlet *Glaucidium*  
163 *perlatum* (Hockey *et al.*, 2005).

164



## 165 3.2 Data collection

166 In each village we visited learners in one primary school (grade 6/7; ages 12-13) and one secondary school  
167 (grade 11/12; ages 17-18). Young people were targeted because environmental education may be more  
168 effective at changing attitudes when people are exposed to concepts earlier in life (Caro *et al.*, 1994), and  
169 they can also successfully change attitudes of other family members (Marchini and Macdonald, 2019). In  
170 August 2016 we administered a questionnaire (Document S1a) to a total of 283 learners at the two primary  
171 schools and two secondary schools from the two villages (Table S2). We then delivered a 20-minute  
172 presentation on the natural history of owls (slides shown in Document S3). The presentation included  
173 information on the mean number of rodents eaten by a western barn owl and a spotted eagle owl in a night  
174 (Verreux's eagle-owl is uncommon and pearl-spotted owls are largely insectivorous). The scholars were  
175 involved in the presentation by being asked to calculate, based on the information provided, how many  
176 rodents an individual owl could potentially eat in a year. We administered a very similar questionnaire  
177 (Document S1b) to 340 learners at the same four schools in November 2016 to assess whether perceptions  
178 had changed over the intervening three months. Seventy four of the learners that completed questionnaires  
179 in the follow up survey had not watched the presentation, and individuals belonging to this group were used  
180 as a control group. The presentation and questionnaires were conducted in English, and translated into  
181 Tshivenda and Xitsonga by a local interpreter. The questionnaire questions and responses used in the  
182 analysis are shown in Table 1. Informed consent was obtained from the principle of each school and the  
183 teachers of each class, who gave permission to participate in the study after discussing the questionnaires  
184 in detail, and answering any questions they had. The teachers were also present when the questionnaires  
185 were administered.

186

187

188

189

190

191 Table 1. Questions and available responses used in the questionnaire.

| Question                                                                                            | Response                                                 |
|-----------------------------------------------------------------------------------------------------|----------------------------------------------------------|
| 1. Would you like to have an owl nesting near your home?                                            | Yes/no                                                   |
| 2. Would you like to have an owl nesting in the roof of your home?                                  | Yes/no                                                   |
| 3. Would you put up an artificial nest for owls to nest in, in your yard (compound) near your home? | Yes/no                                                   |
| 4. Which of the three choices best describes your feeling towards owls?                             | Not like/no feeling/like                                 |
| 5. Which of the three choices best describes your response to seeing an owl?                        | Not afraid/very afraid/terrified                         |
| 6. What do you do if an owl lands on the roof of your home?                                         | Nothing/run away/chase the owl away/try and kill the owl |
| 7. What did you do the last time you saw an owl?                                                    | Nothing/run away/try and kill the owl                    |
| 8. What do you believe is going to happen if an owl lands on the roof of your home?                 | Open response                                            |
| 9. What problem, if any, do rats and mice cause for you and your family?                            | Open response                                            |

192

193 This research received ethical approval from the University of Venda (SMNS/14/ZOO/03/2802), and was  
194 conducted under a research permit issued by the Limpopo Department of Economic Development,  
195 Environment and Tourism (LEDET) (reference number ZA/LP/88067).

196

### 197 3.3. Data analysis

198 We coded data in such a way that more positive responses regarding perceptions of owls and coexisting  
199 with owls were given more positive values, in order to facilitate interpretation of the results. We tested for  
200 differences in responses to questions with binary responses (questions 1-3) by fitting Bernoulli generalised  
201 linear models to the data using the glm function in the stats package in base R version 3.6.1 (R Development  
202 Core Team, 2019). We used the conditional log-log link functions to allow for more asymmetry in the  
203 distributions. We used responses as dependant variables and stage (either before or after watching the  
204 presentation) as independent variables. To test for differences in responses to questions with multiple  
205 ranked responses (questions 4-7) we fitted ordered logistic regression models, again with responses as  
206 dependant variables and survey as independent variables, using the polr function in the package MASS  
207 (Venables and Ripley, 2002). We used Akaike's information criterion to compare models including  
208 responses from the treatment group against null models, and models including responses from the control  
209 group against null models. Plots were created using ggplot2 (Wickham, 2016). We considered the main  
210 themes emerging in the responses to the open questions 8 and 9, and extracted representative quotes.  
211 Furthermore we categorised responses to question 8 into those that mentioned traditional cultural beliefs  
212 around owls and those that mentioned impacts of owls on controlling rodents. We compared the proportions  
213 of responses falling into these categories between respondents before watching the presentation, in the  
214 follow-up survey after the presentation was given, sub-divided between students that did see the  
215 presentation and those that did not watch the presentation. All data and R code are publicly available  
216 (Williams *et al.*, 2019).

217

## 218 4. Results

219 Perceptions of owls were generally negative both before and after listening to the presentation (Figs 2-3).  
220 But while perceptions towards owls were still negative overall after watching the presentation, responses  
221 to questions 1-6 were less negative after watching the presentation than before watching the presentation,  
222 supporting our hypothesis (Table 2). For question 7 responses did not differ between questionnaires  
223 administered before or after watching the presentation. Models of responses of the control group to each  
224 question fitted the data no better than the null models, suggesting that any differences in the treatment group  
225 were likely to be linked to listening to the presentation.

226

227

228

229

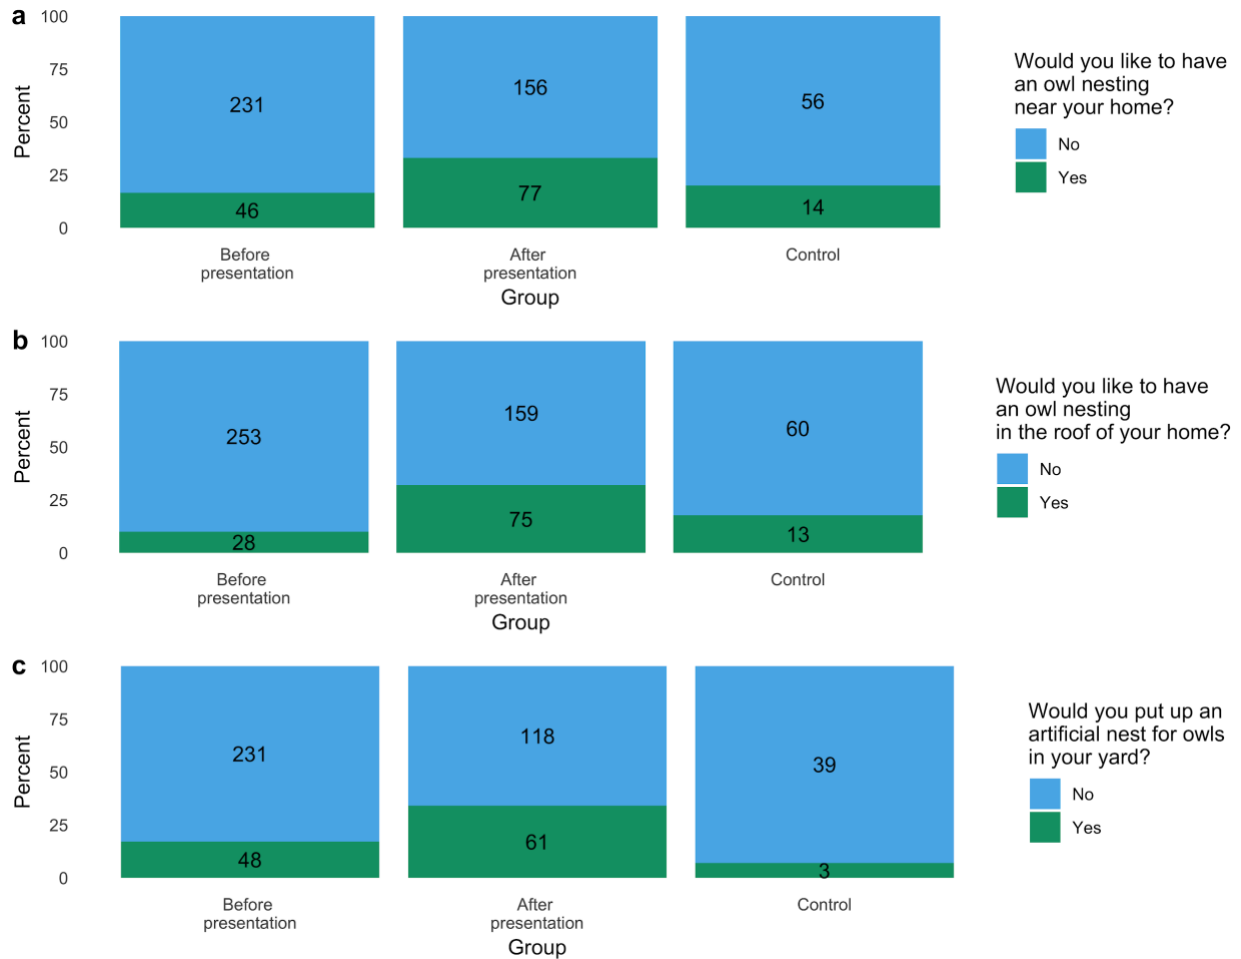

230

231 Fig. 2. Responses to questions with binary responses (a) question 1; b) question 2; c) question 3) of three  
232 groups of learners: before watching a presentation on the natural history of owls (left); after watching the  
233 presentation (middle); and a control group that did not watch the presentation (right). Number labels show  
234 sample sizes.

235

236

237

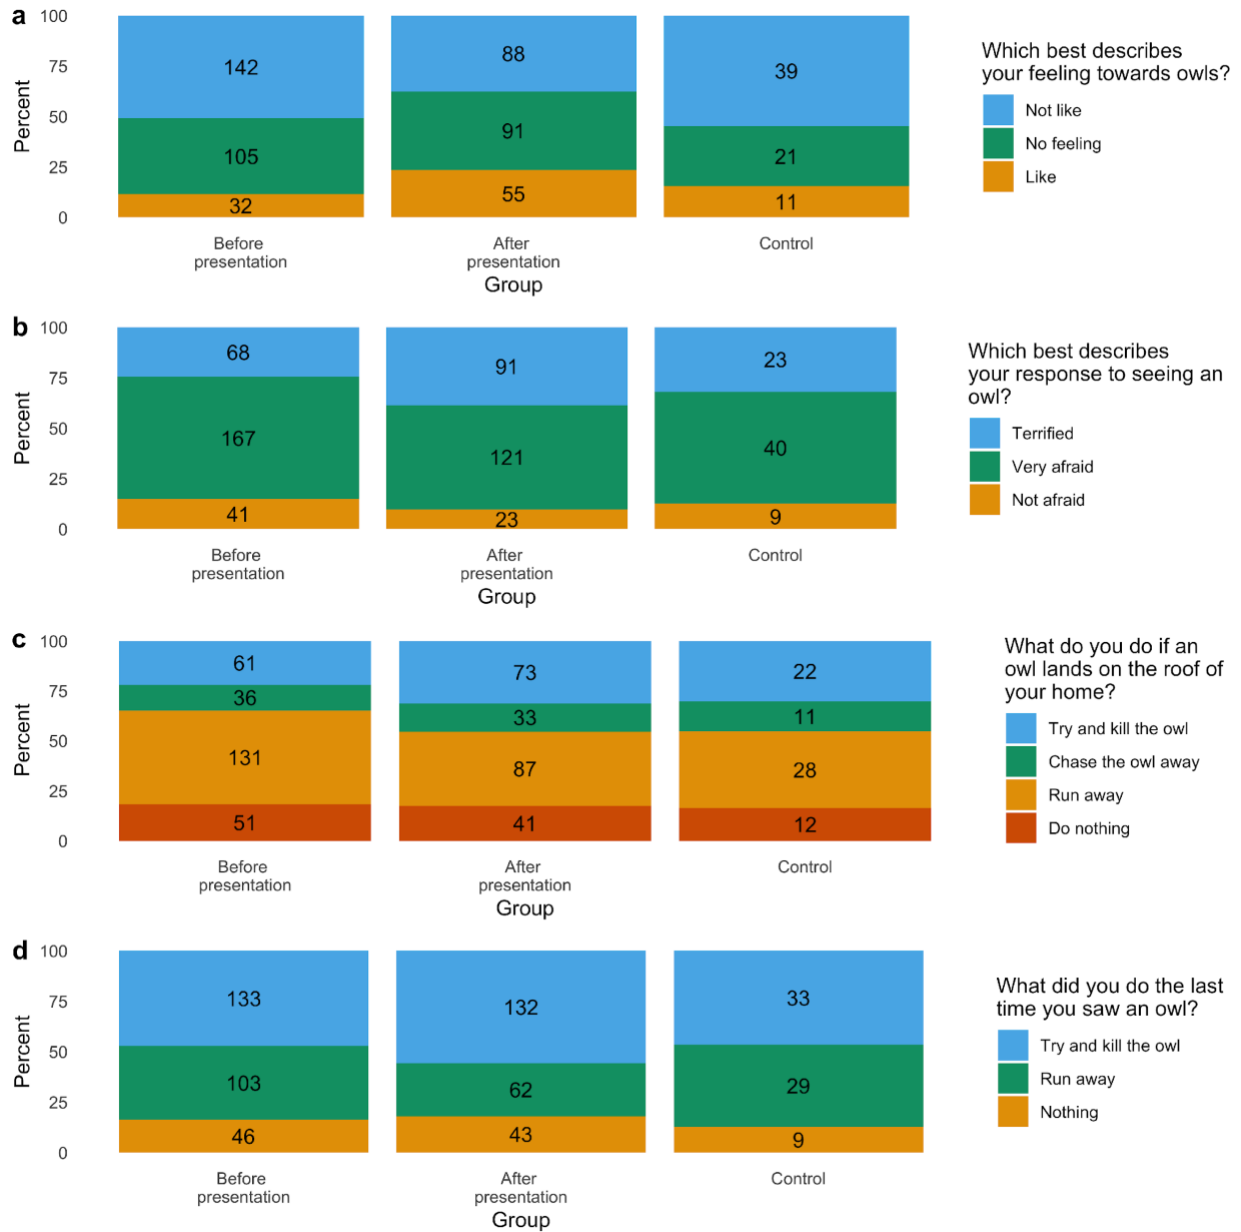

238

239

240 Fig. 3. Responses to questions with more than two responses (a) question 4; b) question 5; c) question 6, d)

241 question 7) of three groups of learners: before watching a presentation on the natural history of owls (left);

242 after watching the presentation (middle); and a control group that did not watch the presentation (right).

243 Number labels show sample sizes.

244

245

246 Table 2. Summary of models of responses to questions on perceptions of owls. Models with best fit, and  
 247 with confidence intervals that do not overlap zero, are shown in bold.

| Question                                                                                                                | Model type                  | Model name       | AIC            | ΔAIC        | Degrees of freedom | 2.5% confidence interval | 97.5% confidence interval | Odds ratio       |
|-------------------------------------------------------------------------------------------------------------------------|-----------------------------|------------------|----------------|-------------|--------------------|--------------------------|---------------------------|------------------|
| Q1: Would you like to have an owl nesting near your home (Yes/No)?                                                      | Bernoulli                   | <b>Treatment</b> | <b>548.76</b>  | <b>0.00</b> | <b>2</b>           | <b>0.4307009</b>         | <b>1.165709</b>           | <b>2.2091569</b> |
|                                                                                                                         |                             | GLM              |                |             |                    |                          |                           |                  |
|                                                                                                                         | GLM                         | Treatment null   | 565.48         | 16.70       | 1                  |                          |                           |                  |
|                                                                                                                         |                             | Control          | 323.13         | 0.00        | 2                  | -0.4302624               | 0.7783122                 | 1.2287654        |
| Q2: Would you like to have an owl nesting in the roof of your home? (Yes/No)                                            | Bernoulli                   | <b>Treatment</b> | <b>479.81</b>  | <b>0.00</b> | <b>2</b>           | <b>0.8808712</b>         | <b>1.754406</b>           | <b>3.6813819</b> |
|                                                                                                                         |                             | GLM              |                |             |                    |                          |                           |                  |
|                                                                                                                         | GLM                         | Treatment null   | 517.41         | 37.60       | 1                  |                          |                           |                  |
|                                                                                                                         |                             | Control          | 254.65         | 0.00        | 2                  | -0.06633402              | 1.263266                  | 1.8683803        |
| Q3: Would you put up an artificial nest for owls to nest in, in your yard (compound) near your home? (Yes/No)           | Bernoulli                   | <b>Treatment</b> | <b>489.86</b>  | <b>0.00</b> | <b>2</b>           | <b>0.4137402</b>         | <b>1.175357</b>           | <b>2.207173</b>  |
|                                                                                                                         |                             | GLM              |                |             |                    |                          |                           |                  |
|                                                                                                                         | GLM                         | Treatment null   | 504.66         | 14.80       | 1                  |                          |                           |                  |
|                                                                                                                         |                             | Control          | 281.80         | 0.00        | 2                  | -2.35006                 | 0.06745143                | 0.3925334        |
| Q4: Which of the three choices best describes your feeling towards owls? (Like/No feeling/Not like)                     | Ordinal logistic regression | <b>Treatment</b> | <b>1048.78</b> | <b>0.00</b> | <b>4</b>           | <b>0.3012243</b>         | <b>0.9643519</b>          | <b>1.881341</b>  |
|                                                                                                                         |                             | GLM              |                |             |                    |                          |                           |                  |
|                                                                                                                         | GLM                         | Treatment null   | 1060.96        | 12.20       | 3                  |                          |                           |                  |
|                                                                                                                         |                             | Control          | 684.45         | 2.00        | 4                  | -0.5778764               | 0.4458171                 | 0.9419206        |
| Q5: Which of the three choices best describes your response to seeing an owl? (Not afraid/Very afraid/Terrified)        | Ordinal logistic regression | <b>Treatment</b> | <b>963.30</b>  | <b>0.00</b> | <b>4</b>           | <b>0.2657433</b>         | <b>0.9566639</b>          | <b>1.83948</b>   |
|                                                                                                                         |                             | GLM              |                |             |                    |                          |                           |                  |
|                                                                                                                         | GLM                         | Treatment null   | 973.46         | 10.20       | 3                  |                          |                           |                  |
|                                                                                                                         |                             | Control          | 726.65         | 0.60        | 4                  | -0.7946631               | 0.222922                  | 0.7507923        |
| Q6: What do you do if an owl lands on the roof of your home? (Run away/Nothing/Try and kill the owl/Chase the owl away) | Ordinal logistic regression | <b>Treatment</b> | <b>1331.63</b> | <b>0.00</b> | <b>5</b>           | <b>0.01945016</b>        | <b>0.65954542</b>         | <b>1.402969</b>  |
|                                                                                                                         |                             | GLM              |                |             |                    |                          |                           |                  |
|                                                                                                                         | GLM                         | Treatment null   | 1333.96        | 2.30        | 4                  |                          |                           |                  |
|                                                                                                                         |                             | Control          | 906.50         | 0.00        | 5                  | -0.1232518               | 0.837112                  | 0.837112         |
| Q7: What did you do the last time you saw an owl? (Run away/Nothing/Try and kill the owl)                               | Ordinal logistic regression | Treatment        | 1054.50        | 0.19        | 4                  | -0.1046666               | 0.5577318                 | 1.253468         |
|                                                                                                                         |                             | GLM              |                |             |                    |                          |                           |                  |
|                                                                                                                         | GLM                         | Treatment null   | 1054.31        | 0.00        | 3                  |                          |                           |                  |
|                                                                                                                         |                             | Control          | 722.65         | 0.90        | 4                  | -0.4380951               | 0.5392407                 | 1.048204         |
|                                                                                                                         |                             | Control null     | 720.69         | 0.00        | 3                  |                          |                           |                  |

248  
 249 The dominant theme in responses to the open questions on perceptions of owls was the involvement of owls  
 250 in witchcraft, and the negative consequences that this will have for those that live in areas with owls. When  
 251 asked “What do you believe is going to happen if an owl lands on the roof of your home?” typical responses  
 252 include “Someone going to die”, “That someone is about to bewitch me”, “I believe that it is sent by  
 253 witches”, or “Nothing happy, I will chase it away”. Some respondents also expressed more utilitarian views  
 254 such as “It will help me killing rats” or “I will just try to kill it because it make a problem - noise”. In  
 255 contrast, when asked “What problem, if any, do rats and mice cause for you and your family?”, respondents  
 256 were less likely to share supernatural beliefs, again focussing on utilitarian impacts such as “Eat food,  
 257 clothes, baby, door, everything”, “[Make me] sick”, or “Bring owl and snakes at home”. After watching the  
 258 presentation answers given in response to the question “What do you believe is going to happen if an owl

259 lands on the roof of your home?” shifted. Prior to the presentation, 52.6% of responses (n=228) expressed  
260 that the owl was sent by witches and would bring bad omens upon their household, and 13.2% of responses  
261 suggested that the owl would kill rodents. Other responses such as utilitarian concerns and worries about  
262 owls making noises comprised the remainder of responses. Following the environmental education  
263 programme, 20.7% of responses given by presentation attendees (n = 92) pertained to witchcraft and ill  
264 omens while 27.1% of responses focussed on predation of mice and rats by owls.

265

## 266 5. Discussion

267 Perceptions of owls were less negative after watching the presentation than before watching the  
268 presentation. Despite this shift, perceptions of owls still remained negative overall, which was linked to  
269 their associations with witchcraft, although the prevalence of responses relating to a negative association  
270 between owls and witchcraft appeared to be lower among respondents that had seen the presentation than  
271 those that had not. This is not surprising given how strongly-held beliefs in the supernatural tend to be  
272 (Dickman and Hazzah, 2016) and the low intensity with which the education programme was implemented.  
273 But these findings nevertheless demonstrate that even modest educational programmes that involve the  
274 delivery of only a single presentation can reduce negative perceptions of culturally stigmatised wildlife. A  
275 more intensive environmental education programme involving more sessions would be likely to improve  
276 perceptions of wildlife further (Kruse and Card, 2004), and although these can be costly and time-intensive  
277 to implement (Leisher *et al.*, 2012), a longer term approach is recommended for species with strong negative  
278 cultural associations.

279

280 The improved attitudes of participants towards owls fits well with previous findings that participation in an  
281 environmental education scheme involving talks and activities about lemurs (superfamily Lemuroidea) in  
282 Madagascar during a single day was sufficient to improve knowledge and attitudes of school children in



283 relation to these species (Rakotomamonjy *et al.*, 2015). Similarly, an environmental education programme  
284 that centred on screening three 20-minute educational films on the threats posed to mountain gorillas  
285 *Gorilla beringei beringei* and chimpanzees *Pan troglodytes schweinfurthii* for school children in Uganda  
286 was able improve attitudes towards great apes and knowledge of conservation actions (Leeds *et al.*, 2017).  
287 In these communities, however, the focal species are not strongly linked with negative supernatural  
288 superstitions (Leeds *et al.*, 2017; Rakotomamonjy *et al.*, 2015).

289  
290 Indigenous knowledge systems play an important role in conservation and environmental education, and  
291 their integration can be advantageous, especially if traditional beliefs benefit wildlife and communities  
292 (Maila and Loubser, 2003; Risiro *et al.*, 2013). Perceptions stemming from traditional beliefs or  
293 superstitions can also pose challenges to human-wildlife coexistence, which manifest in multiple forms  
294 such as right of passage ritual killings of animals (Hazzah *et al.*, 2009), trade in endangered species for  
295 traditional medicine (Williams *et al.*, 2013), and persecution of animals associated with bad omens or  
296 demonstrating taboo behaviours (Forth, 2007). In our study area and in other examples, negative  
297 perceptions of owls can result in damage to ecosystems and missed opportunities for farming communities  
298 to benefit from ERBM programmes (Mikkola and Mikkola, 1997; Ogada and Kibuthu, 2008).  
299 Environmental education programmes need to identify barriers that limit stakeholder engagement and  
300 carefully consider strategies to overcome these (Offord-Woolley *et al.*, 2016). A culturally sensitive  
301 approach is required when addressing concepts surrounding witchcraft (Ashforth, 1996; Cumes, 2004).

302 Outsiders may fail to grasp the dynamic and modern applications of witchcraft and cause offence by  
303 ignoring or misrepresenting the concept's sensitive and secretive characteristics (Geschiere, 1997). If  
304 possible, conservation organisations should include community members in the design and implementation  
305 of environmental education programmes to guarantee that locally specific cultural perspectives and  
306 priorities are incorporated (Jacobson *et al.*, 2015; Offord-Woolley *et al.*, 2016). For owls and many other  
307 species, a wide variety of contradictory beliefs are associated with the species globally (Enriquez and

308 Mikkola, 1997; Forth, 2007; Glickman, 1995), demonstrating the importance of ascertaining a local  
309 perspective in conservation initiatives. Hence our environmental education programme partnered with a  
310 local translator and focussed on ecology and ecosystem services of owls, rather than attempting to dissuade  
311 participants from beliefs in witchcraft. It is also important to allow time for people to readjust to new  
312 information and perceptions of a historically disliked species (Linnell *et al.*, 2003), especially when  
313 perceptions have existed in communicative memory and cultural memory for long periods (Assmann and  
314 Czaplicka, 1995). An interesting extension of this study would be to assess the programme's longer-term  
315 effectiveness on changing perceptions. Furthermore, delivery of the education programme by teaching staff  
316 at the schools may prove more effective than delivery by an external scientist, as this could signal that the  
317 message was socially accepted (Marchini and Macdonald, 2019).

318

319 In addition to superstitious views of owls, respondents tended to frame positive and negative views  
320 pertaining to owls and rodents in utilitarian terms. This is not surprising, as lower income communities  
321 have a more pressing urgency to fulfil basic needs than higher income groups, and are consequently more  
322 likely to consider animals from a utilitarian perspective (Infield, 1988). Wildlife perceived to be devoid of  
323 a useful purpose is seldom considered worthy of preservation by lower income communities (Griffiths,  
324 2017; Williams, 2017). In South Africa, financial inequality, poverty, and economic marginalisation of  
325 certain groups from viewing wildlife has resulted in widespread attitudes that wildlife has little value  
326 (Griffiths, 2017). Within South Africa, beliefs in witchcraft and supernatural powers are more  
327 commonplace in impoverished areas, specifically parts of Limpopo and Eastern Cape provinces (Ashforth,  
328 1996; Kohnert, 2003; Niehaus *et al.*, 2001). High levels of poverty and prevalent beliefs in witchcraft  
329 amplify owl vulnerability in Limpopo province. Environmental education schemes focussing on animals  
330 associated with witchcraft should assign these species with positive, sustainable, and accessible utilitarian  
331 values, such as those owls generate in the context of EBRM, to promote species conservation.

332

333 Our findings also suggest that in addition to enhancing perceptions of wildlife, environmental education  
334 could be also an incredibly useful tool to increase participation in community programmes such as EBRM  
335 initiatives. Respondents that watched the presentation were more likely to say they would be willing to  
336 have an owl box installed in their yard, which could help reduce rodent densities in fields by increasing owl  
337 populations in agricultural areas (Paz *et al.*, 2013). Although the animal welfare implications of using  
338 indigenous predators to control pests rather than relying on poison have recently been questioned (Allen *et*  
339 *al.*, 2019), there is little doubt that using ecosystem services provided by natural predators would be more  
340 ecologically sound and more sustainable than chemical rodenticides for community members farming in  
341 rural agro-ecosystems (Singleton *et al.*, 1999).

342

343 We note, however, that while we observed increased theoretical willingness to participate in a future EBRM  
344 programme involving erecting owl nesting boxes, further studies are required to assess whether this would  
345 translate into actual increased participation after the launch of such a scheme, as this is not always the case  
346 (Waylen *et al.*, 2009; Young *et al.*, 2013). Engaging students in constructing, erecting, and potentially  
347 monitoring owl boxes provides a constructive extension to a low intensity environmental education  
348 programme, and fortifies concepts presented in the classroom through empowering actions. An  
349 environmental education programme conducted in a semi-urban area in Gauteng province, South Africa,  
350 engaged students in a similar multi-pronged approach and following the experience, both the students  
351 involved and their families replaced superstitious beliefs about owls with more positive perspectives  
352 (Meyer, 2008). Another limitation of our study was the relatively small sample size, so follow-up studies  
353 would

354

355 In conclusion, our findings indicate that even a low intensity environmental education programme can  
356 improve young people's perceptions of a species associated with witchcraft, and their propensity to  
357 undertake positive environmental actions. In Africa, beliefs in witchcraft and the supernatural have evolved  
358 in response to shifting politics and modernisation (McEwan, 2008; Niehaus *et al.*, 2001). Through culturally

359 sensitive and locally inclusive environmental education, negative perceptions of animals affiliated with  
360 witchcraft can also evolve to benefit communities, farmers, and wildlife.

361

## 362 6. References

363 Allen, B.L., Allen, L.R., Ballard, G., Drouilly, M., Fleming, P.J., Hampton, J.O., Hayward, M.W., Kerley,  
364 G.I., Meek, P.D., Minnie, L., O' Riain, M.J., Parker, D.M. and Somers, M.J. (2019) Animal welfare  
365 considerations for using large carnivores and guardian dogs as vertebrate biocontrol tools against other  
366 animals. *Biological Conservation* **232**, 258-270. doi:10.1016/j.biocon.2019.02.019.

367

368 Ashforth, A. (1996) Of secrecy and the commonplace: witchcraft and power in Soweto. *Social Research*  
369 **63**, 1183-1234.

370

371 Ashforth, A. (2005) *Witchcraft, violence and democracy in South Africa*. The University of Chicago Press,  
372 Chicago.

373

374 Assmann, J. and Czaplicka, J. (1995) Collective memory and cultural identity. *New German Critique* **65**,  
375 125-133.

376

377 Balmford, A. and Cowling, R.M. (2006) Fusion or failure? The future of conservation biology.  
378 *Conservation Biology* **20**, 692-695. doi:10.1111/j.1523-1739.2006.00434.x.

379

380 Becken, S., Lama, A.K. and Espiner, S. (2013) The cultural context of climate change impacts: Perceptions  
381 among community members in the Annapurna Conservation Area, Nepal. *Environmental Development* **8**,  
382 22-37. doi:10.1016/j.envdev.2013.05.007.

- 383
- 384 Binnema, T.T. and Niemi, M. (2006) ‘Let the line be drawn now’: wilderness, conservation, and the  
385 exclusion of aboriginal people from Banff National Park in Canada. *Environmental History* **11**, 724-750.  
386 doi:10.1093/envhis/11.4.724.
- 387
- 388 Boudet, H., Ardoin, N.M., Flora, J., Armel, K.C., Desai, M. and Robinson, T.N. (2016) Effects of a  
389 behaviour change intervention for girl scouts on child and parent energy-saving behaviours. *Nature Energy*  
390 **1**, 16091, doi:16010.11038/nenergy.12016.16091.
- 391
- 392 Buckle, A.P. and Smith, R.H. (2015) *Rodent pests and their control*. CAB International, Wallingford and  
393 Boston.
- 394
- 395 Caro, T.M., Pelkey, N. and Grigione, M. (1994) Effects of conservation biology education on attitudes  
396 toward nature. *Conservation Biology* **8**, 846-852.
- 397
- 398 Cook, C.N., Pullin, A.S., Sutherland, W.J., Stewart, G.B. and Carrasco, L.R. (2017) Considering cost  
399 alongside the effectiveness of management in evidence-based conservation: a systematic reporting protocol.  
400 *Biological Conservation* **209**, 508-516. doi:10.1016/j.biocon.2017.03.022.
- 401
- 402 Cumes, D.M. (2004) *Africa in my bones: a surgeon's odyssey into the spiritworld of African healing*.  
403 Spearhead, Claremont.
- 404
- 405 Dickman, A., Marchini, S. and Manfredo, M. (2013) The human dimension in addressing conflict with  
406 large carnivores. *Key Topics in Conservation B* **2**, 110-126. doi:10.1002/9781118520178.
- 407

408 Dickman, A.J. (2010) Complexities of conflict: the importance of considering social factors for effectively  
409 resolving human–wildlife conflict. *Animal Conservation* **13**, 458-466. doi:10.1111/j.1469-  
410 1795.2010.00368.x.

411  
412 Dickman, A.J. and Hazzah, L. (2016) Money, myths and man-eaters: complexities of human–wildlife  
413 conflict, In *Problematic wildlife: a cross-disciplinary approach*. pp. 339-356. Springer, Cham.

414  
415 Drew, J.A. and Henne, A.P. (2006) Conservation biology and traditional ecological knowledge: integrating  
416 academic disciplines for better conservation practice. *Ecology and Society* **11**, 34.

417  
418 Enriquez, P.A. and Mikkola, H. (1997) Comparative study of general public owl knowledge in Costa Rica,  
419 Central America and Malawi, Africa, In *Biology and conservation of owls of the northern hemisphere: 2nd*  
420 *International symposium*. eds. Duncan, J.R., Johnson, D.H. and Nicholls, T.H., pp. 160-166. US Dept. of  
421 Agriculture, Forest Service, North Central Forest Experiment Station, St. Paul.

422  
423 Farmer, J., Knapp, D. and Benton, G.M. (2007) An elementary school environmental education field trip:  
424 Long-term effects on ecological and environmental knowledge and attitude development. *The Journal of*  
425 *Environmental Education* **38**, 33-42. doi:10.3200/JOEE.38.3.33-42.

426  
427 Flor, R.J.B. and Singleton, G.R. (2011) Can media campaign messages influence change towards  
428 ecologically based rodent management? *Wildlife Research* **38**, 579-587. doi:10.1071/WR10166.

429  
430 Forth, G. (2007) Can animals break taboos?: applications of ‘taboo’ among the Nage of Eastern Indonesia.  
431 *Oceania* **77**, 215-231. doi:10.1002/j.1834-4461.2007.tb00013.x.

432

- 433 Garibaldi, A. and Turner, N. (2004) Cultural keystone species: implications for ecological conservation and  
434 restoration. *Ecology and Society* **9**, 1-18. doi:10.5751/ES-00669-090301.  
435
- 436 Geschiere, P. (1997) *The modernity of witchcraft: politics and the occult in postcolonial Africa*. University  
437 of Virginia Press, Charlottesville.  
438
- 439 Glickman, S.E. (1995) The spotted hyena from Aristotle to *The Lion King*: reputation is everything. *Social*  
440 *Research* **62**, 501-537.  
441
- 442 Gradin, C. (2014) Race and income distribution: evidence from the USA, Brazil and South Africa. *Review*  
443 *of Development Economics* **18**, 73-92. doi:10.1111/rode.12070.  
444
- 445 Griffiths, M. (2017) Heritage lost: The cultural impact of wildlife crime in South Africa. *South African*  
446 *Crime Quarterly* **60**, 45-50. doi:10.17159/2413-3108/2017/v0n60a1728.  
447
- 448 Hazzah, L., Mulder, M.B. and Frank, L. (2009) Lions and warriors: social factors underlying declining  
449 African lion populations and the effect of incentive-based management in Kenya. *Biological Conservation*  
450 **142**, 2428-2437. doi:10.1016/j.biocon.2009.06.006.  
451
- 452 Hickel, J. (2014) "Xenophobia" in South Africa: order, chaos, and the moral economy of witchcraft.  
453 *Cultural Anthropology* **29**, 103-127.  
454
- 455 Hijmans, R.J., Cameron, S.E., Parra, J.L., Jones, P.G. and Jarvis, A. (2005) Very high resolution  
456 interpolated climate surfaces for global land areas. *International Journal of Climatology* **25**, 1965-1978.  
457 doi:10.1002/joc.1276.  
458

- 459 Hockey, P.A., Dean, W.R.J., Ryan, P.G., Maree, S. and Brickman, B. (2005) Roberts' Birds of Southern  
460 Africa, Seventh edn. John Voelcker Bird Book Fund, Cape Town.  
461
- 462 Holmes, G., Smith, T. and Ward, C. (2018) Fantastic beasts and why to conserve them: animals, magic and  
463 conservation mythobiology. *Oryx* **52**, 231-239. doi:10.1017/S003060531700059X.  
464
- 465 Infield, M. (1988) Attitudes of a rural community towards conservation and a local conservation area in  
466 Natal, South Africa. *Biological Conservation* **45**, 21-46. doi:10.1016/0006-3207(88)90050-x.  
467
- 468 Jacob, J., Singleton, G.R., Herawati, N.A. and Brown, P.R. (2010) Ecologically based management of  
469 rodents in lowland irrigated rice fields in Indonesia. *Wildlife Research* **37**, 418-427. doi:10.1071/WR10030.  
470
- 471 Jacobson, S.K., McDuff, M.D. and Monroe, M.C. (2015) Conservation education and outreach techniques,  
472 Second edn. Oxford University Press, Oxford.  
473
- 474 Kesby, J.D. (2003) The perceptions of nature and the environment in sub-Saharan Africa, In *Nature across*  
475 *cultures: views of nature and the environment in non-western cultures*. ed. Selin, H., pp. 211-228. Kluwer  
476 Academic Publishers, London  
477
- 478 Knapp, D. and Poff, R. (2001) A qualitative analysis of the immediate and short-term impact of an  
479 environmental interpretive program. *Environmental Education Research* **7**, 55-65.  
480 doi:10.1080/13504620124393.  
481
- 482 Kohnert, D. (2003) Witchcraft and transnational social spaces: witchcraft violence, reconciliation and  
483 development in South Africa's transition process. *Journal of Modern African Studies* **41**, 217-245.  
484 doi:10.1017/s0022278x03004257.



485

486 Kruse, C.K. and Card, J.A. (2004) Effects of a conservation education camp program on campers' self-  
487 reported knowledge, attitude, and behavior. *The Journal of Environmental Education* **35**, 33-45.  
488 doi:10.3200/JOEE.35.4.33-45.

489

490 Labuschagne, L., Swanepoel, L.H., Taylor, P.J., Belmain, S.R. and Keith, M. (2016) Are avian predators  
491 effective biological control agents for rodent pest management in agricultural systems? *Biological Control*  
492 **101**, 94-102. doi:10.1016/j.biocontrol.2016.07.003.

493

494 Lawson, D.F., Stevenson, K.T., Peterson, M.N., Carrier, S.J., Seekamp, E. and Strnad, R. (2019) Evaluating  
495 climate change behaviors and concern in the family context. *Environmental Education Research*, 1-13.  
496 doi:10.1080/13504622.2018.1564248.

497

498 Leeds, A., Lukas, K.E., Kendall, C.J., Slavin, M.A., Ross, E.A., Robbins, M.M., van Weeghel, D. and  
499 Bergl, R.A. (2017) Evaluating the effect of a year-long film focused environmental education program on  
500 Ugandan student knowledge of and attitudes toward great apes. *American Journal of Primatology* **79**,  
501 e22673. doi:10.1002/ajp.22673.

502

503 Leisher, C., Mangubhai, S., Hess, S., Widodo, H., Soekirman, T., Tjoe, S., Wawiyai, S., Larsen, S.N.,  
504 Rumatna, L., Halim, A. and Sanjayan, M. (2012) Measuring the benefits and costs of community education  
505 and outreach in marine protected areas. *Marine Policy* **36**, 1005-1011. doi:10.1016/j.marpol.2012.02.022.

506

507 Linnell, J.D., Solberg, E.J., Brainerd, S., Liberg, O., Sand, H., Wabakken, P. and Kojola, I. (2003) Is the  
508 fear of wolves justified? A Fennoscandian perspective. *Acta Zoologica Lituanica* **13**, 34-40.  
509 doi:10.1080/13921657.2003.10512541.

510

- 511 Madden, F. and McQuinn, B. (2014) Conservation's blind spot: The case for conflict transformation in  
512 wildlife conservation. *Biological Conservation* **178**, 97-106. doi:10.1016/j.biocon.2014.07.015.  
513
- 514 Maila, M.W. and Loubser, C.P. (2003) Emancipatory indigenous knowledge systems: Implications for  
515 environmental education in South Africa. *South African Journal of Education* **23**, 276-280.  
516
- 517 Makundi, R.H. and Massawe, A.W. (2011) Ecologically based rodent management in Africa: potential and  
518 challenges. *Wildlife Research* **38**, 588-595. doi:10.1071/WR10147.  
519
- 520 Marchini, S., Macdonald, D.W. (2019) Can school children influence adults' behavior toward jaguars?  
521 Evidence of intergenerational learning in education for conservation. *Ambio*. doi: 10.1007/s13280-019-  
522 01230-w.  
523
- 524 Mascia, M.B., Brosius, P., Dobson, T.A., Forbes, B.C., Horowitz, L., McKean, M.A. and Turner, N.J.  
525 (2003) Conservation and the social sciences. *Conservation Biology* **17**, 649-650. doi:10.1046/j.1523-  
526 1739.2003.01738.x.  
527
- 528 McDuff, M.D. and Jacobson, S.K. (2001) Participatory evaluation of environmental education: Stakeholder  
529 assessment of the wildlife clubs of Kenya. *International Research in Geographical and Environmental*  
530 *Education* **10**, 127-148. doi:10.1080/09709274.2009.11906215.  
531
- 532 McEwan, C. (2008) A very modern ghost: postcolonialism and the politics of enchantment. *Environment*  
533 *and Planning D - Society & Space* **26**, 29-46. doi:10.1068/d460t.  
534
- 535 Meyer, S. (2008) The Barn Owl as a control agent for rat populations in semi-urban habitats. MSc Thesis,  
536 University of Witwatersrand.

537

538 Mikkola, H. and Mikkola, H. (1997) General public owl knowledge in Malawi. *The Society of Malawi*

539 *Journal* **50**, 13-35.

540

541 Montgomery, R.A., Elliott, K., Hayward, M., Gray, S.M., Millspaugh, J.J., Riley, S.J., Kissui, B.M.,

542 Kramer, D.B., Moll, R.J. and Mudumba, T. (2018) Examining evident interdisciplinarity among prides of

543 lion researchers. *Frontiers in Ecology and Evolution* **6**, 1-13. doi:10.3389/fevo.2018.00049.

544

545 Morris, B. (2000) *Animals and ancestors: an ethnography*. Berg, Oxford.

546

547 Mucina, L. and Rutherford, M.C. (2006) *The vegetation of South Africa, Lesotho and Swaziland*. South

548 African National Biodiversity Institute, Pretoria.

549

550 Muñoz-Pedreros, A., Guerrero, M. and Möller, P. (2018) Knowledge and perceptions of birds of prey

551 among local inhabitants in Chile: implications for the biological control of rodent pests. *Gayana* **82**, 128-

552 138.

553

554 Naidoo, R., Balmford, A., Ferraro, P.J., Polasky, S., Ricketts, T.H. and Rouget, M. (2006) Integrating

555 economic costs into conservation planning. *Trends in Ecology & Evolution* **21**, 681-687.

556 doi:10.1016/j.tree.2006.10.003.

557

558 Niehaus, I., Mohlala, E. and Shokane, K. (2001) *Witchcraft, power and politics: exploring the occult in the*

559 *South African lowveld*. David Philip Publishers, Claremont.

560

- 561 Offord-Woolley, S., Bamford, P. and Desforges, R. (2016) Developing an environmental-education  
562 programme using Black rhinoceros *Diceros bicornis* in Zambia as a case study. *International Zoo Yearbook*  
563 **50**, 84-95. doi:10.1111/izy.12117.
- 564
- 565 Ogada, D.L. and Kibuthu, P.M. (2008) Conserving Mackinder's eagle owls in farmlands of Kenya:  
566 assessing the influence of pesticide use, tourism and local knowledge of owl habits in protecting a culturally  
567 loathed species. *Environmental Conservation* **35**, 252-260. doi:10.1017/S0376892908005006.
- 568
- 569 Özler, B. (2007) Not separate, not equal: poverty and inequality in post-apartheid South Africa. *Economic*  
570 *development and cultural change* **55**, 487-529. doi:10.1086/511191
- 571
- 572 Paz, A., Jareño, D., Arroyo, L., Viñuela, J., Arroyo, B., Mougeot, F., Luque-Larena, J.J. and Fargallo, J.A.  
573 (2013) Avian predators as a biological control system of common vole (*Microtus arvalis*) populations in  
574 north-western Spain: experimental set-up and preliminary results. *Pest Management Science* **69**, 444-450.  
575 doi:10.1002/ps.3289.
- 576
- 577 Peterson, R.B., Russell, D., West, P. and Brosius, J.P. (2010) Seeing (and doing) conservation through  
578 cultural lenses. *Environmental Management* **45**, 5-18. doi:10.1007/s00267-008-9135-1.
- 579
- 580 R Development Core Team (2019) R: A language and environment for statistical computing. Version 3.6.1.  
581 R Foundation for statistical computing, Vienna.
- 582
- 583 Rakotomamonjy, S., Jones, J., Razafimanahaka, J., Ramamonjisoa, B. and Williams, S. (2015) The effects  
584 of environmental education on children's and parents' knowledge and attitudes towards lemurs in rural  
585 Madagascar. *Animal Conservation* **18**, 157-166. doi:10.1111/acv.12153.
- 586

587 Risiro, J., Tshuma, D. and Basikiti, A. (2013) Indigenous knowledge systems and environmental  
588 management: A case study of Zaka District, Masvingo Province, Zimbabwe. *International Journal of*  
589 *Academic Research in Progressive Education and Development* **2**, 19-39.

590

591 Rust, N.A., Tzanopoulos, J., Humle, T. and MacMillan, D.C. (2016) Why has human–carnivore conflict  
592 not been resolved in Namibia? *Society & Natural Resources* **9**, 1079-1094.  
593 doi:10.1080/08941920.2016.1150544.

594

595 Schmoll, P.G. (1993) Black stomachs, beautiful stones: soul-eating among Hausa in Niger, In *Modernity*  
596 *and its Malcontents: Ritual and Power in Postcolonial Africa*. eds. Comaroff, J. and Comaroff, J., pp. 193-  
597 220. The University of Chicago Press, Chicago.

598

599 Singleton, G.R., Leirs, H., Hinds, L.A. and Zhang, Z. (1999) Ecologically-based management of rodent  
600 pests–re-evaluating our approach to an old problem. *Ecologically-based Management of Rodent Pests*.  
601 Australian Centre for International Agricultural Research (ACIAR), Canberra, pp 17-29.

602

603 Smith, T. A., & Andindilile, W. (2017). Assemblages of forest conservation in Tanzania: gradients between  
604 chiefs, snakes, spirits and witches. *Third World Thematics: A TWQ Journal*, Vol. 2, pp. 316–337. doi:  
605 10.1080/23802014.2017.1348912

606

607 Statistics South Africa (2019a) Ka-Ndengeza [online]. Available from  
608 [http://www.statssa.gov.za/?page\\_id=4286&id=11958](http://www.statssa.gov.za/?page_id=4286&id=11958) [Accessed 26 Aug 2019].

609

610 Statistics South Africa (2019b) Vyeboom [online]. Available from  
611 [http://www.statssa.gov.za/?page\\_id=4286&id=12730](http://www.statssa.gov.za/?page_id=4286&id=12730) [Accessed 26 Aug 2019].

612

613 Swanepoel, L.H., Swanepoel, C.M., Brown, P.R., Eiseb, S.J., Goodman, S.M., Keith, M., Kirsten, F., Leirs,  
614 H., Themb'alilahlwa, A., Makundi, R.H., Malebane, P., von Maltitz, E.F., Massawe, A.W., Monadjem, A.,  
615 Mulungu, L.S., Singleton, G.R., Taylor, P.J. and Soarimalala, V.B., Steven R. (2017) A systematic review  
616 of rodent pest research in Afro-Malagasy small-holder farming systems: Are we asking the right questions?  
617 PLoS ONE **12**, e0174554. doi:10.1371/journal.pone.0174554.  
618  
619 Taylor, P.J., Downs, S., Monadjem, A., Eiseb, S.J., Mulungu, L.S., Massawe, A.W., Themb'a, A.M.,  
620 Kirsten, F., Von Maltitz, E., Malebane, P., Makundi, R.H., Lamb, J. and Belmain, S.R. (2012) Experimental  
621 treatment-control studies of ecologically based rodent management in Africa: balancing conservation and  
622 pest management. *Wildlife Research* **39**, 51-61. doi:10.1071/WR11111.  
623  
624 Tschardtke, T., Clough, Y., Wanger, T.C., Jackson, L., Motzke, I., Perfecto, I., Vandermeer, J. and  
625 Whitbread, A. (2012) Global food security, biodiversity conservation and the future of agricultural  
626 intensification. *Biological Conservation* **151**, 53-59. doi:10.1016/j.biocon.2012.01.068.  
627  
628 Tyrrell, M. (2010) Biodiversity and cultural diversity: the interdependent and the indistinguishable, In  
629 *Nature and Culture: Rebuilding Lost Connections*. eds. Pilgrim, S. and Pretty, J., pp. 123-144. Earthscan,  
630 London.  
631  
632 Venables, W.N. and Ripley, B.D. (2002) *Modern Applied Statistics with S* (fourth edition).  
633  
634 Waylen, K.A., McGowan, P.J., Milner-Gulland, E. and Group, P.S. (2009) Ecotourism positively affects  
635 awareness and attitudes but not conservation behaviours: a case study at Grande Riviere, Trinidad. *Oryx*  
636 **43**, 343-351. doi:10.1017/S0030605309000064.  
637

- 638 White, P.C. and Ward, A.I. (2011) Interdisciplinary approaches for the management of existing and  
639 emerging human–wildlife conflicts. *Wildlife Research* **37**, 623-629. doi:10.1071/WR10191.  
640
- 641 Wickham, H. (2016) *ggplot2: elegant graphics for data analysis*. Springer, Houston.  
642
- 643 Williams, K.S. (2017) Human-brown hyaena relationships and the role of mountainous environments as  
644 refuges in a postcolonial landscape. PhD Thesis, Durham University.  
645
- 646 Williams, S.T., Williams, K.S., Constant, N., Swanepoel, L.H., Taylor, P., Belmain, S.R. and Evans, S.  
647 (2019) Dataset on environmental education & perceptions of culturally taboo wildlife. [Dataset.] Figshare.  
648 Doi: 10.6084/m9.figshare.9734984. Available from <https://figshare.com/s/711295efc8d5f96b21f3>.  
649
- 650 Williams, S.T., Maree, N., Taylor, P., Belmain, S.R., Keith, M. and Swanepoel, L.H. (2018a) Camera trap  
651 and questionnaire dataset on ecosystem services provided by small carnivores in agro-ecosystems in South  
652 Africa. *Data in brief* **18**, 753-759. doi:10.1016/j.dib.2018.03.071.  
653
- 654 Williams, S.T., Maree, N., Taylor, P., Belmain, S.R., Keith, M. and Swanepoel, L.H. (2018b) Predation by  
655 small mammalian carnivores in rural agro-ecosystems: An undervalued ecosystem service? *Ecosystem  
656 Services* **30**, 362-371. doi:10.1016/j.ecoser.2017.12.006.  
657
- 658 Williams, V.L., Cunningham, A.B., Bruyns, R.K. and Kemp, A.C. (2013) Birds of a feather: quantitative  
659 assessments of the diversity and levels of threat to birds used in African traditional medicine, In *Animals  
660 in Traditional Folk Medicine*. pp. 383-420. Springer, Heidelberg.  
661
- 662 World Bank (2007) *World development report 2008: Agriculture for development*. World Bank,  
663 Washington, DC.

664

665 Young, J.C., Jordan, A., Searle, K.R., Butler, A., Chapman, D.S., Simmons, P. and Watt, A.D. (2013) Does  
666 stakeholder involvement really benefit biodiversity conservation? *Biological Conservation* **158**, 359-370.  
667 doi:10.1016/j.biocon.2012.08.018.

668

## 669 7. Acknowledgements

670 We would like to thank the learners that responded to our questionnaires, and the teachers from Thomas  
671 Ntshavheni Primary School and Tshinavhe Secondary School, in Vyeboom, and Anderson Memorial  
672 Primary School and Ndengeza Senior Secondary School, in Ndengeza, for their support. STW was  
673 supported by a postdoctoral grant from the University of Venda. KSW was funded by the Durham  
674 University COFUND research fellowship. PJT acknowledges the financial support of the National  
675 Research Foundation and the Department of Science and Technology through the South African Research  
676 Chair on Biodiversity Value and Change (Grant No. 87311) hosted by the University of Venda and co-  
677 hosted by the Centre for Invasion Biology at Stellenbosch University. NC was supported by a  
678 postdoctoral grant administered by the National Research Foundation under the South African Research  
679 Chair on Biodiversity Value and Change at the University of Venda. LHS was supported by the National  
680 Research Foundation of South Africa (Grant No. 107099) and the University of Venda. This research was  
681 partly funded by a European Union 9th European Development Fund grant from the African Caribbean  
682 and Pacific Science and Technology Programme (StopRats: FED/2013/330-223) and by an African Union  
683 grant (EcoRodMan: AURGII/1/006/2016). The funders had no role in study design, data collection and  
684 analysis, decision to publish, or preparation of the manuscript. The authors declare that no competing  
685 interests exist.

## 686 8. Supplementary information



687 Note that all supplementary information is available in a Figshare repository  
688 (<https://figshare.com/s/711295efc8d5f96b21f3>; doi: p10.6084/m9.figshare.9734984). This repository will  
689 be made publicly accessible upon acceptance of the manuscript. In addition to Document S1 and Table S2  
690 all data and code will also be accessible in the repository.

691  
692 Document S1. Questionnaire administered to learners before and after listening to a presentation on the  
693 natural history of owls.

694  
695 Table S2. Number of respondents at each school that completed the questionnaire before and after  
696 listening to the presentation.

## 697 9. Statements

### 698 Data availability

699 Data available from the Figshare digital repository Williams et al. (2019)  
700 (<https://figshare.com/s/711295efc8d5f96b21f3>; doi: p10.6084/m9.figshare.9734984). This will be made  
701 publicly accessible upon acceptance of the manuscript.

702

### 703 Authors' contributions

704 SWE, LHS, PJT, and SRB conceived the ideas and designed methodology; SWE collected the data; STW  
705 analysed the data; STW, KSW, and NLC led the writing of the manuscript. All authors contributed  
706 critically to the drafts and gave final approval for publication.
